# Supplementary material
Source: publisher figshare collection journal article supplement (https://frontiersin.figshare.com/ndownloader/files/34819150)
Supplement: Supplementary file [file 34819150]

## Appendix D Descriptive characteristics and main results of studies included in the systematic review

| Authors,<br>Publication year                    | Type of<br>Article<br>Manuscript,<br>Unpublished<br>Thesis,<br>Conference<br>Paper,<br>Working<br>Paper<br><br><b>Language</b><br>English<br>Turkish | Sector<br>Type:<br>Public<br>Private<br><br><b>Sector</b><br>Education<br>Health<br>Banking<br>Hospitality<br>Textile<br>Other | N=Sample<br>Size<br>F: Female<br>M: Male | Educational<br>Status<br><br>PS: Primary<br>school,<br>HS: High<br>school,<br>G: Graduate,<br>PG: Postgraduate<br>PhD.: Doctorate | Chronbach's Alpha<br>Reliability<br>Coefficient<br>ODS Total<br>(Sub-scale Cronbach's<br>Alpha values were<br>taken for studies that<br>did not give ODS<br>Total Cronbach's<br>Alpha)<br>PC: Participate-Criticism<br>T: Transparency,<br>J: Justice,<br>E: Equality,<br>A: Accountability | Variables searched<br>to be Related to<br>Organizational<br>Democracy                                                                                      | Main Results                                                                                                                                                                                                                                                                                                                                                                                                                                                                                                                                                                                                                                                                                                  |
|-------------------------------------------------|------------------------------------------------------------------------------------------------------------------------------------------------------|--------------------------------------------------------------------------------------------------------------------------------|------------------------------------------|-----------------------------------------------------------------------------------------------------------------------------------|---------------------------------------------------------------------------------------------------------------------------------------------------------------------------------------------------------------------------------------------------------------------------------------------|------------------------------------------------------------------------------------------------------------------------------------------------------------|---------------------------------------------------------------------------------------------------------------------------------------------------------------------------------------------------------------------------------------------------------------------------------------------------------------------------------------------------------------------------------------------------------------------------------------------------------------------------------------------------------------------------------------------------------------------------------------------------------------------------------------------------------------------------------------------------------------|
| 1. Kesen, 2015a.                                | Paper/<br><br>English                                                                                                                                | Private/<br><br>Retail<br>Sector                                                                                               | N=142<br>F:62<br>M: 80                   | PS: 9<br>HS: 80<br>G: 53                                                                                                          | .954                                                                                                                                                                                                                                                                                        | -Organizational<br>identification<br>- Job satisfaction                                                                                                    | - A significant and positive correlation was found between ODS subscales and Organizational Identification (r=.304-.433).<br>- Significant and positive correlations were found between ODS subscales and Job Satisfaction (r=.237-495).                                                                                                                                                                                                                                                                                                                                                                                                                                                                      |
| 2. Kesen, 2015b.                                | Paper/<br><br>Turkish                                                                                                                                | Private/<br><br>Retail<br>Sector                                                                                               | N=174<br>F:85<br>M: 89                   | PS: 11<br>HS: 95<br>G: 68                                                                                                         | .954                                                                                                                                                                                                                                                                                        | - Employee<br>performance<br>- Organizational<br>identification                                                                                            | - A significant and positive correlation was found between ODS subscales and Employee Performance (r=.272-.362).<br>- A significant and positive correlation was found between ODS subscales and Organizational identification (r=.375-482).                                                                                                                                                                                                                                                                                                                                                                                                                                                                  |
| 3. Geçkil, İleri,<br>Kaya and Karadağ,<br>2016. | Paper/<br><br>English                                                                                                                                | Public and<br>Private/<br><br>Hospital<br>Employees<br>(Physician<br>and Nurse)                                                | N=363<br>F:232<br>M:131                  | HS: 73<br>G: 191<br>PG: 99                                                                                                        | .933                                                                                                                                                                                                                                                                                        | - Psychological capital<br>- Demographics<br>(profession, age,<br>educational status,<br>gender, marital status,<br>experience in<br>hospital)             | - A significant and positive correlation was found between ODS total and psychological capital (r=.126).<br>- Significant and positive correlations were found between ODS subscales and psychological capital (r=.015-.174).<br><b>Demographics</b><br>- A significant relationship was found between ODS total and profession against nurses (t=-2.589; p=.010)<br>- A significant correlation was found between ODS total scores and age (F=-2.912; p=.034). ODS scores of individuals under the age of 40 are lower than those of those over the age of 40.<br>- It was determined that there was no significant relationship between ODS scores and education, marital status, and working time (p>.05). |
| 4. Geckil and Tikici,<br>2016.                  | Paper/<br><br>English                                                                                                                                | Public/<br><br>Hospital<br>Employees<br>(Physician,<br>Nurse,<br>Laborant<br>and officer)                                      | N=582<br>F=351<br>M=231                  | HS: 61<br>G: 319<br>PG: 202                                                                                                       | .940                                                                                                                                                                                                                                                                                        | - Organizational<br>citizenship behaviors<br>(OCB)<br>- Demographics<br>(Gender, age,<br>educational status,<br>profession,<br>experience in<br>hospital.) | - A significant and negative correlation was found between ODS total and subscales and OCB Altruism subscale (r= -.118 to -.193).<br>- A significant and positive correlation was found between ODS total and subscales and OCB Conscientiousness subscale (r=.379-.682).<br>- A significant and positive correlation was found between ODS total and subscales and OCB Courtesy subscale (r= .470-.786).<br>- There was no significant correlation between ODS total and subscales of OCB's Sportsmanship subscale (p>.05).<br>- A significant and positive correlation was found between ODS total and subscales and OCB Civic Virtue subscale (r= .531-.892).                                              |

|                                  |                   |                                                                         |                                        |                                                  |                                                      |                                                                                                                                                                                            |                                                                                                                                                                                                                                                                                                                                                                                                                                                                                                                                                                                                                                                                                                                                                                                                                                                                                                                                                                                                                                                                                                                                                                     |
|----------------------------------|-------------------|-------------------------------------------------------------------------|----------------------------------------|--------------------------------------------------|------------------------------------------------------|--------------------------------------------------------------------------------------------------------------------------------------------------------------------------------------------|---------------------------------------------------------------------------------------------------------------------------------------------------------------------------------------------------------------------------------------------------------------------------------------------------------------------------------------------------------------------------------------------------------------------------------------------------------------------------------------------------------------------------------------------------------------------------------------------------------------------------------------------------------------------------------------------------------------------------------------------------------------------------------------------------------------------------------------------------------------------------------------------------------------------------------------------------------------------------------------------------------------------------------------------------------------------------------------------------------------------------------------------------------------------|
|                                  |                   |                                                                         |                                        |                                                  |                                                      |                                                                                                                                                                                            | <b>Demographics</b> <ul style="list-style-type: none"> <li>- A significant correlation was found between ODS total and gender in favor of males (<math>t=-3.920</math>; <math>p=.000</math>)</li> <li>- A significant relationship was found between ODS total and profession against nurses (<math>F=-3.132</math>; <math>p=.025</math>)</li> <li>- A significant correlation was found between total ODS and working time (<math>F=-8.683</math>; <math>p=.000</math>). ODS scores of those working for less than 1 year were found to be significantly higher than the others.</li> <li>- It was determined that there was no significant relationship between the participants' ODS scores and their education and age (<math>p&gt;.05</math>).</li> </ul>                                                                                                                                                                                                                                                                                                                                                                                                      |
| 5.Bakan, Güler and Kara, 2017.   | Paper/<br>Turkish | Private/<br>Hospitality Industry                                        | N=201<br>F:88<br>M: 113                | PS: 5<br>HS: 24<br>G: 172                        | PC: .809<br>T: .793<br>J: .750<br>E: .689<br>A: .679 | <ul style="list-style-type: none"> <li>- Organizational justice</li> <li>- Perceived organizational support</li> </ul>                                                                     | <ul style="list-style-type: none"> <li>- A significant and positive correlation was found between ODS subscales and organizational justice subscales (<math>r=.478-.769</math>).</li> <li>- A significant and positive correlation was found between ODS subscales and organizational support (<math>r=.365-.714</math>).</li> </ul>                                                                                                                                                                                                                                                                                                                                                                                                                                                                                                                                                                                                                                                                                                                                                                                                                                |
| 6.Geçkil, Akpınar and Taş, 2017. | Paper/<br>Turkish | Public/<br>Hospital Employees (Physician, Nurse, Lab orant and officer) | N= 405<br>F:268<br>M: 137              | Unknown                                          | .944                                                 | <ul style="list-style-type: none"> <li>- Job satisfaction</li> <li>- Demographics (profession, age, educational status, gender, marital status, experience in hospital, income)</li> </ul> | <ul style="list-style-type: none"> <li>- A significant and positive correlation was found between ODS total scores and job satisfaction total (<math>r=.622</math>).</li> <li>- Significant and positive correlations were found between ODS subscale scores and job satisfaction subscales (<math>r=.391-.559</math>).</li> </ul> <b>Demographics</b> <ul style="list-style-type: none"> <li>- A significant correlation was found between ODS total score and gender in favor of males (<math>t=-2.929</math>; <math>p=.004</math>).</li> <li>- A significant relationship was found between ODS total score and profession against nurses (<math>F=-10.235</math>; <math>p=.000</math>)</li> <li>- A significant relationship was found between ODS total score and working time (<math>F=-3.037</math>; <math>p=.029</math>). ODS total scores of those who have worked for less than 5 years are higher than the others.</li> <li>- A significant correlation was found between the total ODS and age (<math>F=-3.106</math>; <math>p=.046</math>). ODS scores of individuals under the age of 40 are lower than those of those over the age of 41.</li> </ul> |
| 7.Geçkil and Koçyiğit, 2017.     | Paper/<br>Turkish | Private/<br>Hospitality Industry                                        | N=144<br>F: 41<br>M: 102<br>Unknown: 1 | PS: 34<br>HS: 60<br>G: 42<br>PG: 5<br>Unknown: 3 | .950                                                 | <ul style="list-style-type: none"> <li>- Psychological capital</li> </ul>                                                                                                                  | <ul style="list-style-type: none"> <li>- A significant and positive correlation was found between ODS total and psychological capital total scores (<math>r=.338</math>).</li> <li>- There was no significant correlation between ODS total and subscales and psychological capital optimism subscale scores (<math>p&gt;.05</math>).</li> <li>- Significant and positive correlations were found between ODS total and subscales and psychological capital resilience subscale scores (<math>r=.389-.561</math>).</li> <li>- Significant and positive correlations were found between ODS total and subscales and psychological capital hope subscale scores (<math>r=.227-.301</math>).</li> <li>- Significant and positive correlations were found between ODS total and subscales and psychological capital self-efficacy subscale scores (<math>r=.196-.270</math>).</li> </ul>                                                                                                                                                                                                                                                                                |
| 8.Işık, 2017.                    | Paper/<br>Turkish | Public/<br>İŞKUR                                                        | N=32<br>F: 14<br>M: 18                 | HS: 2<br>G: 18<br>PG: 12                         | .866                                                 | <ul style="list-style-type: none"> <li>- Demographics (age, gender, marital status, educational status, job positions/profession,</li> </ul>                                               | <ul style="list-style-type: none"> <li>- A significant positive correlation was found between the age of the participants and the ODS accountability subscale (<math>r=.506</math>; <math>p=.003</math>) and equality subscale scores (<math>r=.401</math>; <math>p=.023</math>). As age increases, scores increase.</li> </ul>                                                                                                                                                                                                                                                                                                                                                                                                                                                                                                                                                                                                                                                                                                                                                                                                                                     |

|                                       |                                 |                                                                                     |                                          |                                                   |                                                      |                                                                                                                   |                                                                                                                                                                                                                                                                                                                                                                                                                                                                                                                                                                                                                                                                                                                                                                                                                                                                                                                                                                                       |
|---------------------------------------|---------------------------------|-------------------------------------------------------------------------------------|------------------------------------------|---------------------------------------------------|------------------------------------------------------|-------------------------------------------------------------------------------------------------------------------|---------------------------------------------------------------------------------------------------------------------------------------------------------------------------------------------------------------------------------------------------------------------------------------------------------------------------------------------------------------------------------------------------------------------------------------------------------------------------------------------------------------------------------------------------------------------------------------------------------------------------------------------------------------------------------------------------------------------------------------------------------------------------------------------------------------------------------------------------------------------------------------------------------------------------------------------------------------------------------------|
|                                       |                                 | (an<br>employe<br>nt agency)                                                        |                                          |                                                   |                                                      | income, and job<br>tenure).                                                                                       | <ul style="list-style-type: none"> <li>- A negative significant correlation (<math>r = -.468</math>; <math>p = .007</math>) was found between the education level of the participants and the accountability subscale scores of the ODS.</li> <li>- A positive and significant correlation (<math>r = .607</math>; <math>p = .000</math>) was found between the participants' working time and the accountability subscale scores of the ODS.</li> </ul>                                                                                                                                                                                                                                                                                                                                                                                                                                                                                                                              |
| 9. Işıkgöz, Esentaş and Dinçer, 2017. | Paper/<br>English               | Public/<br>Education<br>Sector                                                      | N= 191<br>F: 72<br>M: 119                | G: 161<br>PG: 30                                  | .910                                                 | - Demographics<br>(gender, marital<br>status, educational<br>status, school type)                                 | <b>Demographics</b> <ul style="list-style-type: none"> <li>- There was no significant relationship between ODS subscales scores and gender, school type, marital status, educational status (<math>p &gt; .05</math>).</li> <li>- Significant relationships were found between ODS transparency, justice, and accountability subscales scores, and assigned geographical region (<math>p &lt; .05</math>).</li> <li>- A significant correlation was found between ODS equality subscale scores and duration of the experience (Chi-square: 11.319(df:5); <math>p = .045</math>). The equality subscale score of employees between 1-5 years is higher than those with 21-25 years of experience.</li> </ul>                                                                                                                                                                                                                                                                           |
| 10. Öge and Çiftçi, 2017.             | Paper/<br>Turkish               | Private/<br>Automotive<br>Textile                                                   | N= 77<br>F: 52<br>M: 24<br>Unknown: 1    | PS: 36<br>HS: 30<br>G: 8<br>PG: 1<br>Unknown: 2   | No Information                                       | - Intrapreneurship<br>tendency                                                                                    | <ul style="list-style-type: none"> <li>- A significant and positive correlation was found between ODS total and intrapreneurship tendency total scores (<math>r = .668</math>).</li> <li>- Significant and positive correlations were found between ODS total and subscales and intrapreneurship tendency innovation subscale scores (<math>r = .267-.521</math>). No significant relationship was found with the ODS justice subscale.</li> <li>- Significant and positive correlations were found between ODS total and subscales and intrapreneurship tendency risk-taking and proactivity subscale scores (<math>r = .268-.663</math>). ODS equality subscale did not show a significant correlation.</li> <li>- Significant and positive correlations were found between ODS total and subscales and intrapreneurship tendency autonomy subscale scores (<math>r = .291-.471</math>). ODS did not show any significant correlation with equity and justice subscales.</li> </ul> |
| 11. Atalay, 2018.                     | Paper/<br>English               | Public/<br>The<br>Provincial<br>Directorate<br>s of Youth<br>Services<br>and Sports | N= 920<br>F: 322<br>M: 598               | PS: 16<br>HS: 112<br>G: 757<br>PG: 24<br>PhD.: 11 | .787                                                 | - Demographics (age,<br>gender, marital status,<br>educational status,<br>profession and<br>geographical region). | <b>Demographics</b> <ul style="list-style-type: none"> <li>- A significant relationship was found between ODS total, ODS justice, and accountability subscales scores and the education levels of the participants (<math>p &lt; .05</math>). Participants with Ph.D. education levels had significantly higher ODS total, justice, and accountability subscale scores (<math>p &lt; .05</math>).</li> <li>- A significant relationship was found between the ODS transparency subscale and occupation. Coaches' transparency subscale scores were found to be significantly higher (<math>p &lt; .05</math>).</li> <li>- Some significant relationships were found between ODS total and subscale scores according to geographical region (<math>p &lt; .05</math>).</li> </ul>                                                                                                                                                                                                      |
| 12. Aykanat and Yıldız, 2018.         | Conference<br>Paper/<br>Turkish | Public/<br>Municipality                                                             | N= 120<br>F:<br>Unknown<br>M:<br>Unknown | Unknown                                           | PC: .810<br>T: .880<br>J: .810<br>E: .660<br>A: .850 | - Social capital                                                                                                  | <ul style="list-style-type: none"> <li>- Significant and positive correlations were found between ODS subscales and social capital structural (<math>r = .556-.645</math>), relational (<math>r = .303-.591</math>) and cognitive (<math>r = .460-.688</math>) subscale scores.</li> </ul>                                                                                                                                                                                                                                                                                                                                                                                                                                                                                                                                                                                                                                                                                            |
| 13. Çankaya, 2018.                    | Paper/                          | Public/                                                                             | N= 200<br>F: 76                          | HS: 84<br>G: 84                                   | PC: .875                                             | - Job satisfaction                                                                                                | <ul style="list-style-type: none"> <li>- Significant and positive correlations were found between ODS subscales job satisfaction total scores (<math>r = .449-.563</math>).</li> </ul>                                                                                                                                                                                                                                                                                                                                                                                                                                                                                                                                                                                                                                                                                                                                                                                                |

|                               |                              |                                                             |                          |                                           |                                                      |                                                                                                                                                |                                                                                                                                                                                                                                                                                                                                                                                                                                                                                                                                                                                                                                                                                                                                                                                                                                                                                                                                                                                                                                                                                                                                                                                                                                                                                                                                      |
|-------------------------------|------------------------------|-------------------------------------------------------------|--------------------------|-------------------------------------------|------------------------------------------------------|------------------------------------------------------------------------------------------------------------------------------------------------|--------------------------------------------------------------------------------------------------------------------------------------------------------------------------------------------------------------------------------------------------------------------------------------------------------------------------------------------------------------------------------------------------------------------------------------------------------------------------------------------------------------------------------------------------------------------------------------------------------------------------------------------------------------------------------------------------------------------------------------------------------------------------------------------------------------------------------------------------------------------------------------------------------------------------------------------------------------------------------------------------------------------------------------------------------------------------------------------------------------------------------------------------------------------------------------------------------------------------------------------------------------------------------------------------------------------------------------|
|                               | Turkish                      | Hospital Employees (Physician, Nurse, Laborant and officer) | M:124                    | PG: 32                                    | T: .924<br>J: .878<br>E: .754<br>A: .794             | - Demographics (profession, age, educational status, gender, marital status, experience in hospital, income)                                   | - Significant and positive correlations were found between ODS subscales and job satisfaction intrinsic satisfaction subscale scores ( $r = .411-.498$ ).<br>- Significant and positive correlations were found between ODS subscales and job satisfaction extrinsic satisfaction subscale scores ( $r = .457-.602$ ).<br><b>Demographics</b><br>- A significant correlation was found between the participants' ODS total scores and gender in favor of males ( $t = -3.332$ ; $p = .001$ ).<br>- A significant correlation was found between the participants' ODS total scores and their marital status in favor of singles ( $t = -3.837$ ; $p = .000$ ).<br>- A significant correlation was found between ODS total and age ( $F = -10.259$ ; $p = .000$ ). ODS scores of individuals under the age of 30 are lower than those of those aged 31-40.<br>- A significant relationship was found between the total ODS and educational status ( $F = -10.259$ ; $p = .000$ ). The ODS score of those whose education level is High School is lower than vocational school.<br>- A significant relationship was found between the total ODS and experience in the hospital ( $F = -5.377$ ; $p = .000$ ). Participants with less than 5 years of experience have a lower ODS total score than those with 11-15 years of experience. |
| 14. Karagöz and Atilla, 2018. | Paper/<br>Turkish            | Public and Private/<br>Banking Sector                       | N=142<br>F:72<br>M: 70   | G: 131<br>PG: 11                          | .943                                                 | - Psychological capital                                                                                                                        | - A significant positive correlation was found between ODS total and psychological capital total scores ( $r = .391$ ; $p = .000$ ).                                                                                                                                                                                                                                                                                                                                                                                                                                                                                                                                                                                                                                                                                                                                                                                                                                                                                                                                                                                                                                                                                                                                                                                                 |
| 15. Tokay and Eyüpoglu, 2018. | Paper/<br>English            | Private/<br>Banking Sector                                  | N=240<br>F:116<br>M:124  | HS: 25<br>G: 128<br>PG: 87                | .790                                                 | - Organizational citizenship behaviors (OCB)<br>- Demographics (Gender, age, educational status, marital status, experience in banking sector) | - Significant and positive correlations were found between ODS total and subscales and organizational citizenship behaviors total scores ( $r = .201-.404$ ).<br><b>Demographics</b><br>- It was determined that there was no significant relationship between the participants' ODS scores and gender, age, education in status, marital status, and experience in the banking sector ( $p > .05$ ).                                                                                                                                                                                                                                                                                                                                                                                                                                                                                                                                                                                                                                                                                                                                                                                                                                                                                                                                |
| 16. Bakan and Gözükar, 2019.  | Conference Paper/<br>Turkish | Public/<br>Municipality                                     | N=181<br>F: 42<br>M: 138 | HS: 41<br>G: 114<br>PG: 14<br>Unknown: 11 | PC: .914<br>T: .900<br>J: .866<br>E: .788<br>A: .835 | - Organizational depression                                                                                                                    | - Significant and negative correlations were found between ODS subscales and organizational depression scores ( $r = -.601$ to $-.714$ ).                                                                                                                                                                                                                                                                                                                                                                                                                                                                                                                                                                                                                                                                                                                                                                                                                                                                                                                                                                                                                                                                                                                                                                                            |
| 17. Barutçu, 2019.            | Master Thesis/<br>Turkish    | Private/<br>Banking Sector                                  | N=120<br>F: 58<br>M: 62  | G: 84<br>PG: 36                           | PC: .805<br>T: .718<br>J: .712<br>E: .725<br>A: .786 | - Organizational citizenship behaviors (OCB)<br>- Demographics (age, gender, marital status,                                                   | - ODS subscale scores explain 74.1% of the change in OCB (Adjusted $R^2 = .741$ ; $p = .000$ ).<br>- ODS transparency ( $\beta = .074$ ; $p = .030$ ), justice ( $\beta = .454$ ; $p = .000$ ), equality ( $\beta = .501$ ; $p = .000$ ), and accountability ( $\beta = .105$ ; $p = .008$ )                                                                                                                                                                                                                                                                                                                                                                                                                                                                                                                                                                                                                                                                                                                                                                                                                                                                                                                                                                                                                                         |

|                                   |                        |                                                                                       |                           |                                      |      |                                                                                                                                                                                                                     |                                                                                                                                                                                                                                                                                                                                                                                                                                                                                                                                                                                                                                                                                                                                                                                                                                                                                                                                                                                                                                                                                                                                                                                                                                                                                                                                                                                                                                                                                                                                                                                                                                                                                                                                                                             |
|-----------------------------------|------------------------|---------------------------------------------------------------------------------------|---------------------------|--------------------------------------|------|---------------------------------------------------------------------------------------------------------------------------------------------------------------------------------------------------------------------|-----------------------------------------------------------------------------------------------------------------------------------------------------------------------------------------------------------------------------------------------------------------------------------------------------------------------------------------------------------------------------------------------------------------------------------------------------------------------------------------------------------------------------------------------------------------------------------------------------------------------------------------------------------------------------------------------------------------------------------------------------------------------------------------------------------------------------------------------------------------------------------------------------------------------------------------------------------------------------------------------------------------------------------------------------------------------------------------------------------------------------------------------------------------------------------------------------------------------------------------------------------------------------------------------------------------------------------------------------------------------------------------------------------------------------------------------------------------------------------------------------------------------------------------------------------------------------------------------------------------------------------------------------------------------------------------------------------------------------------------------------------------------------|
|                                   |                        |                                                                                       |                           |                                      |      | educational status, profession/position, and experience in job).                                                                                                                                                    | <p>subscale scores significantly and positively affect OCB scores (<math>p&lt;.05</math>).</p> <ul style="list-style-type: none"> <li>- There was no significant correlation between ODS participation-criticism subscale and OCB scores (<math>p&gt;.05</math>).</li> </ul> <p><b>Demographics</b></p> <ul style="list-style-type: none"> <li>- There was no significant relationship between ODS scores and participants' gender, age, education level, marital status, job position, and duration of the experience (<math>p&gt;.05</math>).</li> </ul>                                                                                                                                                                                                                                                                                                                                                                                                                                                                                                                                                                                                                                                                                                                                                                                                                                                                                                                                                                                                                                                                                                                                                                                                                  |
| 18. Günden, 2019.                 | PhD Thesis/<br>Turkish | Private/<br>Hospitality<br>Industry                                                   | N=367<br>F: 194<br>M: 173 | HS: 44<br>G: 318<br>PG: 5            | .865 | - Organizational citizenship behaviors (OCB)                                                                                                                                                                        | - As a result of the path diagram between ODS and OCB, a significant positive relationship was found. In standardized path coefficients, it was observed that a one-unit increase in ODS resulted in a .40-unit increase in OCB ( $r=.40$ ; $p<.05$ ).                                                                                                                                                                                                                                                                                                                                                                                                                                                                                                                                                                                                                                                                                                                                                                                                                                                                                                                                                                                                                                                                                                                                                                                                                                                                                                                                                                                                                                                                                                                      |
| 19. Karatepe, 2019.               | PhD Thesis/<br>Turkish | Public and<br>Private/<br>Hospital<br>Nurses                                          | N=300<br>F: 207<br>M: 93  | HS: 113<br>G: 180<br>PG: 7           | .930 | <ul style="list-style-type: none"> <li>- Political sensitivity</li> <li>- Demographics (age, gender, marital status, educational status, hospital type public or private, income and experience in job).</li> </ul> | <ul style="list-style-type: none"> <li>- Significant positive correlations were found between ODS total and subscales and political sensitivity total (<math>r=.172-.266</math>), knowledge (<math>r=.187-.317</math>), cognition (<math>r=.130-.199</math>), participation (<math>r=.119-.202</math>) and, subscales of interest (<math>r=.136-.195</math>).</li> <li>- No significant correlation was found between the ODS Justice subscale and political sensitivity cognition subscale scores (<math>p&gt;0.05</math>).</li> </ul> <p><b>Demographics</b></p> <ul style="list-style-type: none"> <li>- Men's ODS justice subscale scores were found to be significantly higher than women's scores (<math>t=-1.93</math> <math>p=.04</math>).</li> <li>- Singles had significantly higher ODS total (<math>t=3.70</math>; <math>p=.00</math>) and all subscale scores (<math>p&lt;.05</math>).</li> <li>- ODS equality subscale scores of vocational school graduates were found to be significantly higher than graduate graduates (<math>F=4.10</math>; <math>p=.00</math>).</li> <li>- It was determined that the ODS total (<math>t=8.12</math>; <math>p=.00</math>) and all subscale scores of the participants working in private hospitals were significantly higher than the scores of those working in public hospitals (<math>p&lt;.05</math>).</li> <li>- It was found that as the working time of the participants increased, their justice scores decreased significantly (<math>r=-.132</math>; <math>p&lt;.05</math>).</li> <li>- A significant negative correlation was found between the income level of the participants and the ODS total (<math>r=-.358</math>; <math>p&lt;.01</math>) and all subscale scores (<math>p&lt;.05</math>).</li> </ul> |
| 20. Naldöken and Limoncu, (2019). | Paper/<br>Turkish      | Public/<br>Hospital<br>Employees<br>(Physician,<br>Nurse,<br>Laborant<br>and officer) | N= 326<br>F:170<br>M:156  | PS: 16<br>HS: 75<br>G: 194<br>PG: 41 | .929 | <ul style="list-style-type: none"> <li>- Organizational commitment</li> <li>- Demographics (gender, age, marital status, educational status, profession and job tenure)</li> </ul>                                  | <ul style="list-style-type: none"> <li>- Positive and significant correlations were found between ODS total and subscales and organizational commitment total scores (<math>r=.302-.446</math>).</li> <li>- Positive and significant correlations were found between ODS total and subscales and organizational commitment affective commitment subscale scores (<math>r=.270-.368</math>).</li> <li>- Positive and significant correlations were found between ODS total and organizational commitment continuance commitment subscale (<math>r=.016</math>). There is no significant relationship between ODS and its subscales and organizational commitment continuance commitment subscale (<math>p&gt;.05</math>).</li> <li>- Positive and significant correlations were found between ODS total and subscales and organizational commitment normative commitment subscale (<math>r=.352-.489</math>).</li> </ul>                                                                                                                                                                                                                                                                                                                                                                                                                                                                                                                                                                                                                                                                                                                                                                                                                                                     |

|                                       |                           |                                              |                           |                                        |                                                      |                                                                                                                                                                                 |                                                                                                                                                                                                                                                                                                                                                                                                                                                                                                                                                                                                                                                                                                                                                                                                                                                                                                                                                                                                                                                                                                                                                                                                                                                 |
|---------------------------------------|---------------------------|----------------------------------------------|---------------------------|----------------------------------------|------------------------------------------------------|---------------------------------------------------------------------------------------------------------------------------------------------------------------------------------|-------------------------------------------------------------------------------------------------------------------------------------------------------------------------------------------------------------------------------------------------------------------------------------------------------------------------------------------------------------------------------------------------------------------------------------------------------------------------------------------------------------------------------------------------------------------------------------------------------------------------------------------------------------------------------------------------------------------------------------------------------------------------------------------------------------------------------------------------------------------------------------------------------------------------------------------------------------------------------------------------------------------------------------------------------------------------------------------------------------------------------------------------------------------------------------------------------------------------------------------------|
|                                       |                           |                                              |                           |                                        |                                                      |                                                                                                                                                                                 | <p>Demographics</p> <ul style="list-style-type: none"> <li>- It was found that there was no significant relationship between ODS scores, gender, and duration of the experience (<math>p&gt;.05</math>).</li> <li>- Singles had significantly higher ODS total and subscale scores (<math>p&lt;.05</math>).</li> </ul>                                                                                                                                                                                                                                                                                                                                                                                                                                                                                                                                                                                                                                                                                                                                                                                                                                                                                                                          |
| 21. Uysal, 2019.                      | Master Thesis/<br>Turkish | Public/<br>Sea Transportat<br>ion Sector     | N=316<br>F: 18<br>M: 298  | PS: 54<br>HS: 147<br>G: 114<br>PG: 1   | .922                                                 | - Organizational<br>commitment                                                                                                                                                  | - A significant relationship was found between ODS total and organizational commitment total scores ( $p<.05$ ).                                                                                                                                                                                                                                                                                                                                                                                                                                                                                                                                                                                                                                                                                                                                                                                                                                                                                                                                                                                                                                                                                                                                |
| 22. Yalçınkaya, 2019.                 | Master Thesis/<br>Turkish | Private/<br>Communication<br>Sector          | N=397<br>F: 254<br>M: 143 | HS: 140<br>G: 222<br>PG: 35            | PC: .821<br>T: .741<br>J: .782<br>E: .711<br>A: .724 | <ul style="list-style-type: none"> <li>- Organizational commitment</li> <li>- Demographics (age, gender, marital status, educational status, and experience in job).</li> </ul> | <ul style="list-style-type: none"> <li>- A positive and significant relationship was found between the ODS equality subscale and the organizational commitment affective commitment subscale (<math>\beta=.225</math>; <math>p:.015</math>).</li> <li>- There was no significant relationship between ODS subscales and continuance commitment subscale (<math>p&gt;.05</math>).</li> <li>- A negative and significant relationship was found between ODS participation-criticism and organizational commitment normative commitment subscale (<math>\beta= -.376</math>; <math>p:.000</math>).</li> <li>- A positive and significant relationship was found between ODS transparency and organizational commitment normative commitment subscale (<math>\beta=-.482</math>; <math>p:.000</math>).</li> </ul> <p><b>Demographics</b></p> <ul style="list-style-type: none"> <li>- Men's ODS justice subscale scores were found to be significantly higher than women's scores (<math>t=2.361</math> <math>p=.000</math>).</li> <li>- It was determined that there was no significant relationship between ODS scores and participants' age, education level, marital status, and duration of the experience (<math>p&gt;.05</math>).</li> </ul> |
| 23. Bilyay, Yalçın and Özpolat, 2020. | Paper/<br>Turkish         | Public/<br>Education<br>Sector               | N=202<br>F:135<br>M: 67   | G and PG: 202                          | .700                                                 | <ul style="list-style-type: none"> <li>- Organizational dissent</li> <li>- Demographics (gender, type of school and total employment duration in profession)</li> </ul>         | <ul style="list-style-type: none"> <li>- A significant and positive correlation was found between ODS total and organizational dissent total (<math>r=.220</math>), upward dissent subscale (<math>r=.48</math>) scores.</li> <li>- No significant correlation was found between ODS and lateral dissent and displaced dissent subscales (<math>p&gt;.05</math>).</li> <li>- It was found that the upward dissent subscale explained 14.8% of the variance in the ODS (Adjusted <math>R^2=.148</math>; <math>p=.001</math>).</li> </ul> <p><b>Demographics</b></p> <ul style="list-style-type: none"> <li>- It was found that there was no significant relationship between OD and participants' gender and working time (<math>p&gt;.05</math>).</li> </ul>                                                                                                                                                                                                                                                                                                                                                                                                                                                                                    |
| 24. Erdal, 2020.                      | Master Thesis/<br>Turkish | Public/<br>Educationa<br>l Sector<br>Teacher | N=345<br>F: 238<br>M: 107 | G: 345                                 | .767                                                 | <ul style="list-style-type: none"> <li>- Organizational dissent</li> <li>- Demographics (age, gender, marital status, educational status, and experience in job).</li> </ul>    | <ul style="list-style-type: none"> <li>- A positive and significant correlation was found between ODS and organizational dissent (<math>r=.647</math>).</li> </ul> <p><b>Demographics</b></p> <ul style="list-style-type: none"> <li>- It was determined that there was no significant relationship between ODS and gender, marital status, age, and professional seniority.</li> </ul>                                                                                                                                                                                                                                                                                                                                                                                                                                                                                                                                                                                                                                                                                                                                                                                                                                                         |
| 25. Erkasap, 2020.                    | PhD Thesis/<br>Turkish    | Private/<br>Various<br>Sector                | N=509<br>F: 352<br>M: 157 | HS: 29<br>G: 202<br>PG: 235<br>PhD: 43 | .939                                                 | <ul style="list-style-type: none"> <li>- Personality characteristics</li> <li>- Organizational silence</li> <li>- Organizational dissent</li> </ul>                             | <ul style="list-style-type: none"> <li>- One unit increase in ODS total leads to a .304 increase in organizational dissent total (<math>\beta=.304</math>; <math>p=.003</math>).</li> <li>- ODS transparency subscale has a positive effect on upward dissent subscale (<math>\beta=.464</math>; <math>p=.001</math>). On the other hand, justice (<math>\beta= -.451</math>;</li> </ul>                                                                                                                                                                                                                                                                                                                                                                                                                                                                                                                                                                                                                                                                                                                                                                                                                                                        |

|                              |                           |                                   |                           |                                   |                                                     |                                                                                                                                                                                          |                                                                                                                                                                                                                                                                                                                                                                                                                                                                                                                                                                                                                                                                                                                                                                                                                                                                                                                                                                                                                                                                                                                                                                                                                                                                                                                                                                                                                                                                                                                          |
|------------------------------|---------------------------|-----------------------------------|---------------------------|-----------------------------------|-----------------------------------------------------|------------------------------------------------------------------------------------------------------------------------------------------------------------------------------------------|--------------------------------------------------------------------------------------------------------------------------------------------------------------------------------------------------------------------------------------------------------------------------------------------------------------------------------------------------------------------------------------------------------------------------------------------------------------------------------------------------------------------------------------------------------------------------------------------------------------------------------------------------------------------------------------------------------------------------------------------------------------------------------------------------------------------------------------------------------------------------------------------------------------------------------------------------------------------------------------------------------------------------------------------------------------------------------------------------------------------------------------------------------------------------------------------------------------------------------------------------------------------------------------------------------------------------------------------------------------------------------------------------------------------------------------------------------------------------------------------------------------------------|
|                              |                           |                                   |                           |                                   |                                                     |                                                                                                                                                                                          | <p>p=.001) and accountability (<math>\beta = -.304</math>; p=.001) subscales have a negative impact on organizational dissent.</p> <ul style="list-style-type: none"> <li>- ODS transparency (<math>\beta = -.286</math>; p=.001) and equality (<math>\beta = -.205</math>; p=.001) subscales negatively affect lateral dissent subscale. On the other hand, the participation-criticism subscale positively affects lateral dissent (<math>\beta = .336</math>; p=.001).</li> <li>- One unit increase in ODS leads to a .309 unit decrease in organizational silence (<math>\beta = -.309</math>; p=.004).</li> <li>- The participation-criticism (<math>\beta = -.274</math>; p=.001) transparency (<math>\beta = -.310</math>; p=.001) and justice (<math>\beta = -.134</math>; p=.023) subscales of the ODS were acquiescent silence subscales negatively affects the scale.</li> <li>- ODS equality (<math>\beta = -.162</math>; p=.004) and justice (<math>\beta = -.305</math>; p=.001) subscales negatively affect the defensive silence subscale.</li> <li>- ODS accountability subscale positively affects prosocial silence subscale (<math>\beta = .151</math>; p=.001).</li> <li>- Personality characteristic adaptive peace maker (<math>\beta = .288</math>; p=.005), strict perfectionist (<math>\beta = .323</math>; p=.001), quiet specialist (<math>\beta = .189</math>; p=.037), and loyal sceptic subscales (<math>\beta = .280</math>; p=.007) affect ODS significantly and positively.</li> </ul> |
| 26. Erkasap and Ülgen, 2020. | Working Paper/<br>Turkish | Private/<br>Various Sector        | N= 225<br>F: 161<br>M: 64 | HS: 13<br>G: 89<br>PG: 123        | PC: 938<br>T: .917<br>J: .889<br>E: .916<br>A: .815 | - Organizational dissent                                                                                                                                                                 | <ul style="list-style-type: none"> <li>- ODS transparency subscale (<math>\beta = .286</math>; p=.001) on total organizational dissent was positive; justice (<math>\beta = -.251</math>; p=.001), equality (<math>\beta = -.150</math>; p=.020) and accountability (<math>\beta = -.228</math>; p=.001) subscales had a negative and significant effect has been determined. ODS participation-criticism subscale did not affect the total organizational dissent (p&lt;.05).</li> <li>- On vertical organizational dissent, the ODS transparency subscale (<math>\beta = .459</math>; p=.001) was in the positive direction; justice (<math>\beta = -.445</math>; p=.001) and accountability subscales (<math>\beta = -.331</math>; p=.001) were found to have a negative and significant effect. No significant correlation was found between ODS participation-criticism and equality subscales and upward organizational dissent (p&gt;.05).</li> <li>- On organizational dissent, ODS transparency (<math>\beta = -.192</math>; p=.001) and equality (<math>\beta = -.262</math>; p=.001) subscales were found to be negative; the participation-criticism subscale (<math>\beta = .267</math>; p=.001) was found to have a positive and significant effect. It was determined that ODS justice and accountability subscales did not have a significant effect on organizational lateral dissent (p&gt;.05).</li> </ul>                                                                                            |
| 27. Kara, 2020.              | Master Thesis/<br>Turkish | Private/<br>Industrial Enterprise | N=300<br>F: 54<br>M: 246  | PS and HS: 192<br>G: 89<br>PG: 19 | .940                                                | <ul style="list-style-type: none"> <li>- Intention to quit from job</li> <li>- Demographics (age, gender, marital status, educational status, income, and experience in job).</li> </ul> | <ul style="list-style-type: none"> <li>- A negative and significant correlation was found between ODS total (r=-.418), participation-criticism (r=-.389), transparency (r=-.417), justice (r=-.476), and equality (r=-.165) subscales and intention to quit the job. There was no significant relationship between ODS Accountability subscale and the intention to quit from the job.</li> </ul> <p><b>Demographics</b></p> <ul style="list-style-type: none"> <li>- Men's ODS participation-criticism (t=-5.548; p=.000) and accountability (t=-4.027; p=.001) subscale scores were found to be significantly higher than women's scores.</li> <li>- As the age of the participants increases, the ODS participation-criticism (F=33.509; p=.000), transparency (F=40.522; p=.000), and justice (F=30.638; p=.000) subscale scores increase significantly.</li> </ul>                                                                                                                                                                                                                                                                                                                                                                                                                                                                                                                                                                                                                                                  |

|                               |                   |                                    |                                       |         |      |                                                                                                                       |                                                                                                                                                                                                                                                                                                                                                                                                                                                                                                                                                                                                                                                                                                                                                                                                                                                                                                                                                                                                                                                                                                                                                                                                                                                                                                                                                                                                                                                                                                                        |
|-------------------------------|-------------------|------------------------------------|---------------------------------------|---------|------|-----------------------------------------------------------------------------------------------------------------------|------------------------------------------------------------------------------------------------------------------------------------------------------------------------------------------------------------------------------------------------------------------------------------------------------------------------------------------------------------------------------------------------------------------------------------------------------------------------------------------------------------------------------------------------------------------------------------------------------------------------------------------------------------------------------------------------------------------------------------------------------------------------------------------------------------------------------------------------------------------------------------------------------------------------------------------------------------------------------------------------------------------------------------------------------------------------------------------------------------------------------------------------------------------------------------------------------------------------------------------------------------------------------------------------------------------------------------------------------------------------------------------------------------------------------------------------------------------------------------------------------------------------|
|                               |                   |                                    |                                       |         |      |                                                                                                                       | <ul style="list-style-type: none"> <li>- Participants between the ages of 30-39 had significantly higher ODS scores of equality (<math>F=24.033</math>; <math>p=.000</math>) and accountability (<math>F=12.202</math>; <math>p=.000</math>) subscales.</li> <li>- Participants with high school or lower education levels had higher ODS participation-criticism (<math>t=6.000</math>; <math>p=.003</math>) and transparency (<math>t=5.435</math>; <math>p=.016</math>) subscale scores compared to the scores of participants with higher education levels.</li> <li>- Married participants had significantly higher ODS scores on all subscales (<math>t=-.999</math> to <math>-6.277</math>; <math>p&lt;.05</math>).</li> <li>- ODS participation-criticism (<math>F=69.439</math>; <math>p=.000</math>), transparency (<math>F=122.601</math>; <math>p=.000</math>), justice (<math>F=97.823</math>; <math>p=.000</math>), and equality of participants with work experience of 11 years or more (<math>F=14.406</math>; <math>p=.000</math>) subscale scores were significantly higher than the scores of those with shorter experience.</li> </ul>                                                                                                                                                                                                                                                                                                                                                            |
| 28. Karadağ and Geçkil, 2020. | Paper/<br>Turkish | Public/<br>Higher Education Sector | N=192<br>F:87<br>M: 102<br>Unknown: 3 | PG: 192 | .960 | <ul style="list-style-type: none"> <li>- Organizational silence</li> <li>- Demographics (gender and title)</li> </ul> | <ul style="list-style-type: none"> <li>- Negative and significant correlations were found between ODS total and subscales and organizational silence total scores (<math>r=-.159</math> to <math>-.258</math>).</li> <li>- Negative and significant correlations were found between ODS total and subscales and acquiescent silence subscale scores (<math>r=-.156</math> to <math>-.218</math>). There is no relationship between the ODS justice subscale and acquiescent silence.</li> <li>- Negative and significant correlations were found between ODS total and subscales and defensive silence subscale scores (<math>r=-.184</math> to <math>-.293</math>).</li> <li>- A positive and significant correlation was found between the ODS participation criticism subscale and the prosocial (protective) silence subscale (<math>r=.149</math>). There is no significant relationship between ODS total and other subscales and protective silence subscale.</li> </ul> <p><b>Demographics</b></p> <ul style="list-style-type: none"> <li>- Women's ODS total (<math>t=2.288</math>; <math>p=.023</math>), transparency (<math>t=2.365</math>; <math>p=.019</math>), justice (<math>t=2.696</math>; <math>p=.008</math>) and accountability subscales (<math>t=3.082</math>; <math>p=.002</math>) scores were found to be significantly higher than that of men. No significant correlation was found between ODS participation-criticism and equality subscale and gender (<math>p&gt;.05</math>).</li> </ul> |
| 29. Pelenk, 2020.             | Paper/<br>Turkish | Private/<br>Construction Sector    | N=380<br>F: 95<br>M: 285              | Unknown | .910 | <ul style="list-style-type: none"> <li>- Organizational culture</li> <li>- Organizational dissent</li> </ul>          | <ul style="list-style-type: none"> <li>- Negative and significant correlations were found between ODS justice and transparency subscales and clan culture subscale (<math>r=-.105</math> to <math>-.120</math>).</li> <li>- Positive and significant correlations were found between the ODS participation criticism subscale and the adhocracy culture subscale (<math>r=.103</math>).</li> <li>- Positive and significant correlations were found between ODS subscales and market culture subscale (<math>r=.166</math>-.283).</li> <li>- Positive and significant correlations were found between ODS participation, criticism, equality, and accountability subscales and hierarchy subscale (<math>r=.175</math>-.275).</li> <li>- There was no significant relationship between ODS subscales and upward dissent subscale (<math>p&gt;.05</math>).</li> </ul>                                                                                                                                                                                                                                                                                                                                                                                                                                                                                                                                                                                                                                                   |



|                                |                        |                                                      |                                          |                                |      |                                                                                                                                                                                                                                |                                                                                                                                                                                                                                                                                                                                                                                                                                                                                                                                                                                                                                                                                                                                                                                                                                                                                                                                                                                                                                               |
|--------------------------------|------------------------|------------------------------------------------------|------------------------------------------|--------------------------------|------|--------------------------------------------------------------------------------------------------------------------------------------------------------------------------------------------------------------------------------|-----------------------------------------------------------------------------------------------------------------------------------------------------------------------------------------------------------------------------------------------------------------------------------------------------------------------------------------------------------------------------------------------------------------------------------------------------------------------------------------------------------------------------------------------------------------------------------------------------------------------------------------------------------------------------------------------------------------------------------------------------------------------------------------------------------------------------------------------------------------------------------------------------------------------------------------------------------------------------------------------------------------------------------------------|
|                                |                        |                                                      |                                          |                                |      |                                                                                                                                                                                                                                | <ul style="list-style-type: none"> <li>- Positive and significant correlations were found between the ODS participation criticism, transparency, and justice subscales and the lateral dissent subscale (<math>r=.216-.263</math>).</li> <li>- Positive and significant correlations were found between the ODS participation criticism, transparency, and justice subscales and the displaced dissent subscale (<math>r=.229-.281</math>).</li> </ul>                                                                                                                                                                                                                                                                                                                                                                                                                                                                                                                                                                                        |
| 30.Üst Can, 2020.              | PhD Thesis/<br>Turkish | Public and Private/<br>Higher Educationa<br>l Sector | N=281<br>F: 103<br>M: 174                | G: 13<br>PG: 59<br>PhD: 205    | .957 | <ul style="list-style-type: none"> <li>- Demographics (age, gender, marital status, educational status, university type and experience in job).</li> </ul>                                                                     | <b>Demographics</b> <ul style="list-style-type: none"> <li>- It was determined that there was no significant relationship between ODS and gender, marital status, and professional seniority.</li> <li>- Negative significant correlations were found between ODS accountability subscale scores and age (<math>r=-.137</math>), and education (<math>r=-.121</math>) level (<math>p&lt;.05</math>).</li> </ul>                                                                                                                                                                                                                                                                                                                                                                                                                                                                                                                                                                                                                               |
| 31. Yıldırım and Deniz, 2020.  | Paper/<br>Turkish      | Private                                              | N= 252<br>F:<br>Unknown<br>M.<br>Unknown | PS and HS: 29<br>G and PG: 223 | .943 | <ul style="list-style-type: none"> <li>- Work engagement</li> </ul>                                                                                                                                                            | <ul style="list-style-type: none"> <li>- A one-unit increase in ODS total score causes an increase of 0.407 in work engagement (<math>\beta= .407</math>).</li> <li>- The increase in ODS participation-criticism subscale scores leads to a significant decrease in work engagement vigor, dedication, and absorption subscale scores (<math>\beta= -.205</math> to <math>-.343</math>).</li> <li>- The increase in ODS transparency subscale scores leads to a significant increase in work engagement perseverance, dedication and adoption subscale scores (<math>\beta= .746-.867</math>).</li> <li>- The increase in ODS justice subscale scores leads to a significant decrease in work engagement perseverance, dedication and adoption subscale scores (<math>\beta= -.215</math> to <math>-.402</math>).</li> <li>- The increase in ODS accountability subscale scores leads to a significant decrease in work engagement perseverance and dedication subscale scores (<math>\beta= -.073</math> to <math>-.075</math>).</li> </ul> |
| 32.Çavuş and Biçer, 2021.      | Paper/<br>English      | Private/<br>Various Sector                           | N=257<br>F: 105<br>M: 152                | HS: 70<br>G: 120<br>PG: 57     | .845 | <ul style="list-style-type: none"> <li>- Organizational citizenship behaviors (OCB)</li> </ul>                                                                                                                                 | <ul style="list-style-type: none"> <li>- Positive and significant correlations were found between ODS subscales and OCB altruism subscale (<math>r=.357-.431</math>).</li> <li>- Positive and significant correlations were found between ODS subscales and OCB conscientiousness subscale (<math>r=.435-.496</math>).</li> <li>- There were positive and significant correlations between ODS subscales and OCB courtesy subscale (<math>r=.414-.487</math>).</li> <li>- Positive and significant correlations were found between ODS subscales and OCB civic virtue subscale (<math>r=.614-.676</math>).</li> <li>- Negative and significant correlations were found between ODS subscales and OCB sportsmanship subscale (<math>r=-.390</math> to <math>-.468</math>).</li> </ul>                                                                                                                                                                                                                                                          |
| 33. Geçkil and Şendoğdu, 2021. | Paper/<br>English      | Public and Private/<br>Banking Sector                | N=397<br>F: 171<br>M: 226                | HS: 15<br>G: 323<br>PG: 59     | .960 | <ul style="list-style-type: none"> <li>- Quality of work life</li> <li>- Demographics (age, gender, marital status, educational status, bank type, job positions/profession, income, and working time in business).</li> </ul> | <ul style="list-style-type: none"> <li>- Positive and significant correlations were found between ODS total and subscales and quality of work-life total (<math>r=.545-.801</math>).</li> <li>- ODS total and subscales, job and carrier satisfaction (<math>r=.451-.676</math>), general well-being (<math>r=.509-.716</math>), control at work (<math>r=.410-.697</math>), working conditions (<math>r=.527-.745</math>), stress at work (<math>r=.359-.521</math>), and home-work interface (<math>r=.459-.735</math>) subscales were found to have positive and significant correlations.</li> </ul> <b>Demographics</b> <ul style="list-style-type: none"> <li>- It was found that there was no significant relationship between ODS and gender and educational status (<math>p&gt;.05</math>).</li> <li>- A significant correlation was found between ODS and marital status in favor of singles (<math>t=-2.30</math>; <math>p=.022</math>).</li> </ul>                                                                                |

|                            |                   |                                   |                           |         |      |                    |                                                                                                                                                                                                                                                                                                                                                                                                                                                    |
|----------------------------|-------------------|-----------------------------------|---------------------------|---------|------|--------------------|----------------------------------------------------------------------------------------------------------------------------------------------------------------------------------------------------------------------------------------------------------------------------------------------------------------------------------------------------------------------------------------------------------------------------------------------------|
|                            |                   |                                   |                           |         |      |                    | <ul style="list-style-type: none"> <li>- A significant correlation was found between ODS and age groups (<math>F=5.400</math>; <math>p=.000</math>). The ODS score of the under-31 age group is higher than those aged 32-37.</li> <li>- The ODS scores of those with a working period of 5 years or less were found to be significantly higher than those with a 6-11 year working period (<math>F=4.893</math>; <math>p=.002</math>).</li> </ul> |
| 34. Tokgöz and Önen, 2021. | Paper/<br>English | Public/<br>Educationa<br>l Sector | N=622<br>F: 350<br>M: 272 | Unknown | .940 | - Job stress level | <ul style="list-style-type: none"> <li>- Negative and significant correlations were found between ODS subscales and job stress total (<math>r=-.110</math> to <math>-.230</math>). There was no significant relationship between the ODS accountability subscale and job stress (<math>p&gt;.05</math>).</li> </ul>                                                                                                                                |
